# Supplementary material
Source: publisher figshare collection journal article supplement (https://acs.figshare.com/ndownloader/files/5133985)
Supplement: Supplementary file 1 [file 5133985]

Manuscript Title : (Polymer-oligonucleotide) conjugate synthesis from an amphiphilic block copolymer; applications to DNA detection on microarray.

Bertrand de Lambert, Carole Chaix, Marie-Thérèse Charreyre, Alain Laurent, Arnaud Aigoui, Agnès Perrin-Rubens and Christian Pichot.

### Supporting information :

*a) MALDI-TOF MS analysis (in negative mode) of ODN population present in conjugate synthesis solutions (after collect of the peak eluted on HPLC at 25.8 min (Fig. 7)); a.i. = arbitrary intensity.*

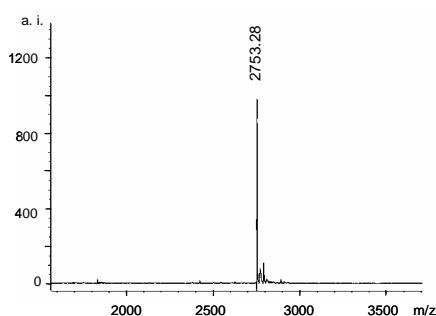

*b) Capping study on HEG-CPG*

| Entry | Capping reaction                                          | ODN synthesized from HEG-CPG<br>(in % compared to experiment 1) |
|-------|-----------------------------------------------------------|-----------------------------------------------------------------|
| 1     | No capping                                                | 100 %                                                           |
| 2     | Ac <sub>2</sub> O <sup>a</sup>                            | 51 %                                                            |
| 3     | Ac <sub>2</sub> O (in solution) <sup>b</sup>              | 25 %                                                            |
| 4     | Ac <sub>2</sub> O <sup>a</sup> + DPP (0.1M)               | 18 %                                                            |
| 5     | Ac <sub>2</sub> O (in solution) <sup>b</sup> + DPP (0.1M) | 10 %                                                            |
| 6     | Ac <sub>2</sub> O + DPP (0.5M)                            | 7 %                                                             |

<sup>a</sup>Ac<sub>2</sub>O reaction on HEG-CPG beads inside the synthesizer

<sup>b</sup>Ac<sub>2</sub>O reaction on HEG-CPG beads carried out in a flask before introduction of the beads in the synthesizer

The reactivity of DPP in addition to acetic anhydride was first evaluated on HEG-CPG (without polymer). For different capping conditions, 25 mer polyT were synthesized from supports and resulting ODN population was analyzed by SEC.

On experiments 2 and 3, two protocols were compared for acetic anhydride capping reaction, i.e. reaction achieved inside the synthesizer (experiment 2) and reaction in a flask with a high amount of reagent (experiment 3). Results clearly evidenced that capping step with acetic anhydride inside the synthesizer was not efficient enough, since 51 % of ODN were obtained in comparison to experiment 1. When acetic anhydride reaction was carried out in a flask, it was more performing but not complete, 25 % of ODN still being initiated from the support. Adding a capping step inside the synthesizer with phosphoramidite reagent (DPP) further improved hydroxyl capping on surface (parasite ODNs decreased from 51% to 18%, experiments 2 and 4). Best results were obtained when achieving successively Ac<sub>2</sub>O capping and DPP (0.5 M in acetonitrile) capping directly inside the synthesizer. A total reduction of 93 % of parasite ODN population was reached in these conditions (entry 6).

*c) Stability study of (block copolymer-ODN) conjugate in ammonia.*

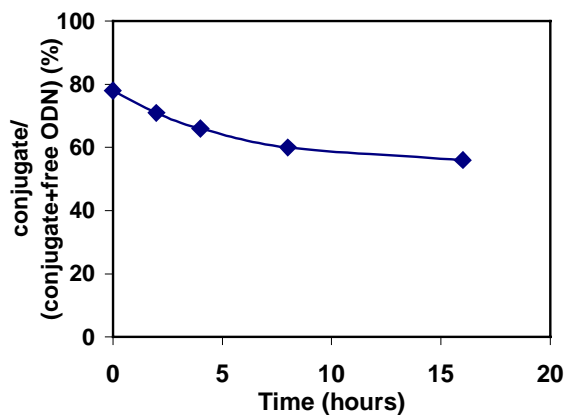

The poly(TBAm-b-(NAM/NAS))-dT25) conjugate was previously purified up to 80% by filtration on membrane prior to carry out degradation kinetics in ammonia (30% NH<sub>4</sub>OH/H<sub>2</sub>O).
